# Supplementary material for: Associations between the structural and functional aspects of social relations and poor mental health: a cross-sectional register study
Source: Springer Nature journal article supplement (doi:10.1186/s12889-017-4871-x), 2017-11-03
Supplement: MOESM1 [file 15190154]

Additional file 1. These questions were translated by the authors of the present study. The original file in Danish can be found at <http://www.rn.dk/Sundhed/Til-sundhedsfaglige-og-samarbejdspartnere/Folkesundhed/Publikationer>

**How often do you get together with friends, acquaintances and family, who you do not live with?**  
(Contact meaning that you are together, talking on the phone, writing to each other, etc.)

(set one X in each line)

|                                                      | Daily or almost daily    | 1 or 2 times a week      | 1 or 2 times a month     | Less than 1 time a month | Never                    |
|------------------------------------------------------|--------------------------|--------------------------|--------------------------|--------------------------|--------------------------|
| Family you do not live with                          | <input type="checkbox"/> | <input type="checkbox"/> | <input type="checkbox"/> | <input type="checkbox"/> | <input type="checkbox"/> |
| Friends                                              | <input type="checkbox"/> | <input type="checkbox"/> | <input type="checkbox"/> | <input type="checkbox"/> | <input type="checkbox"/> |
| Colleagues or fellow students                        | <input type="checkbox"/> | <input type="checkbox"/> | <input type="checkbox"/> | <input type="checkbox"/> | <input type="checkbox"/> |
| Neighbours or residents in your local community      | <input type="checkbox"/> | <input type="checkbox"/> | <input type="checkbox"/> | <input type="checkbox"/> | <input type="checkbox"/> |
| Persons mostly known from internet (mail, chat etc.) | <input type="checkbox"/> | <input type="checkbox"/> | <input type="checkbox"/> | <input type="checkbox"/> | <input type="checkbox"/> |

**Are you in contact with family, friends and acquaintances you do not live with, as often as you like?**  
(Contact meaning that that you are together, talking on the phone, writing to each other, etc.)

(Only one X)

|     |                          |
|-----|--------------------------|
| Yes | <input type="checkbox"/> |
| No  | <input type="checkbox"/> |

**Do you have anyone to talk to, if you are in trouble or in need of support?**

(Only one X)

|                           |                          |
|---------------------------|--------------------------|
| Yes, often                | <input type="checkbox"/> |
| Yes, mostly               | <input type="checkbox"/> |
| Yes, sometimes            | <input type="checkbox"/> |
| No, never or almost never | <input type="checkbox"/> |

**If you become ill and need help with practical problems (e.g. cooking, shopping, cleaning, dressing), can you expect to receive help from others?**

(Only one X)

|                 |                          |
|-----------------|--------------------------|
| Yes, definitely | <input type="checkbox"/> |
| Yes, maybe      | <input type="checkbox"/> |
| No              | <input type="checkbox"/> |
| Do not know     | <input type="checkbox"/> |
